# Supplementary material
Source: PubMed Central journal article supplement (PMC4667132)
Supplement: mmc1.pdf [file mmc1.pdf]

The American Journal of Human Genetics

Supplemental Data

**Germline Heterozygous Variants in *SEC23B*  
Are Associated with Cowden Syndrome  
and Enriched in Apparently Sporadic Thyroid Cancer**

Lamis Yehia, Farshad Niazi, Ying Ni, Joanne Ngeow, Madhav Sankunny, Zhigang Liu,  
Wei Wei, Jessica L. Mester, Ruth A. Keri, Bin Zhang, and Charis Eng

Figure S1. Variant Filtering Strategy in Family 616 and Prioritization of *SEC23B*

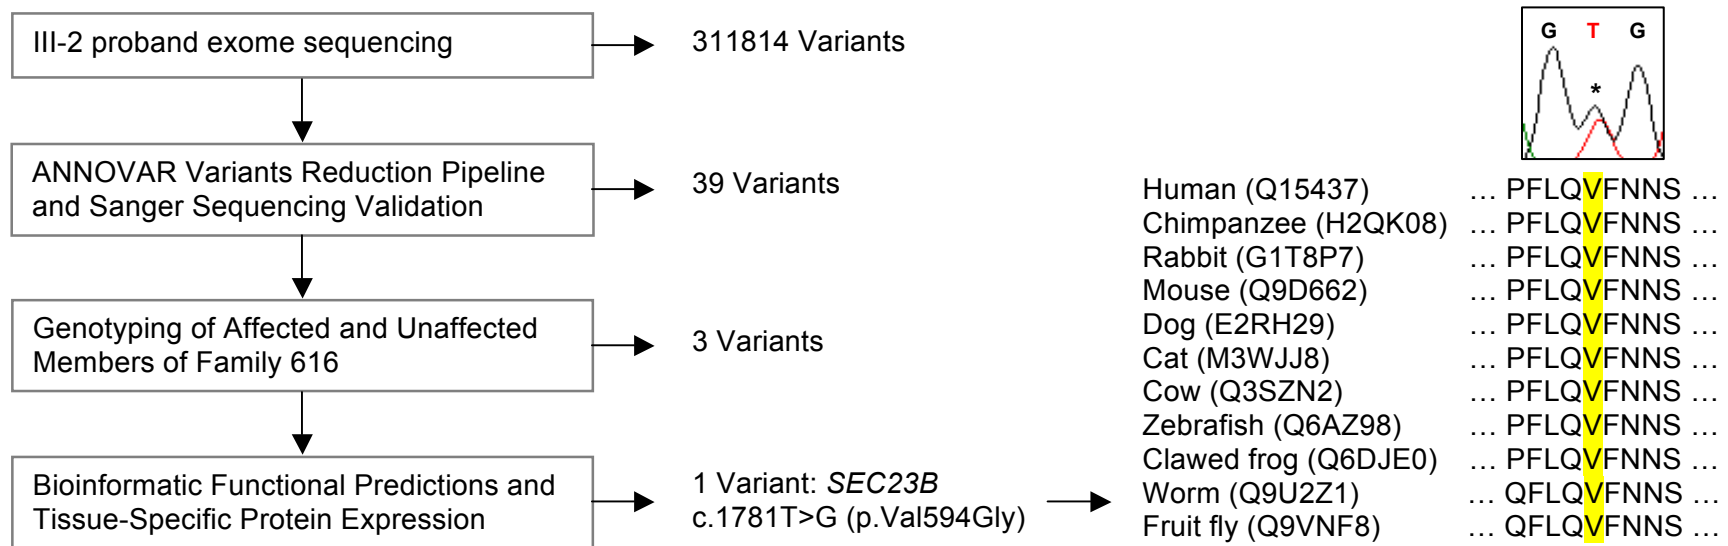

Filtering criteria for gene prioritization are on the left and the number of variants retained shown on the right of the workflow. The missense heterozygous variant prioritized in family 616 shows high evolutionary conservation of the affected amino acid residue across ten different species besides human. A Uniprot accession code is given in parentheses for each species and the affected amino acid is highlighted in yellow. Above the sequence is a representative chromatogram from the proband (III-2).

Figure S2. Cellular Phenotype in 293T-*SEC23B* V594G Cells Shows Aberrant *SEC23B* Protein Accumulation, Increased Migration and Upregulation of Expression of Epithelial-to-Mesenchymal Transition Genes

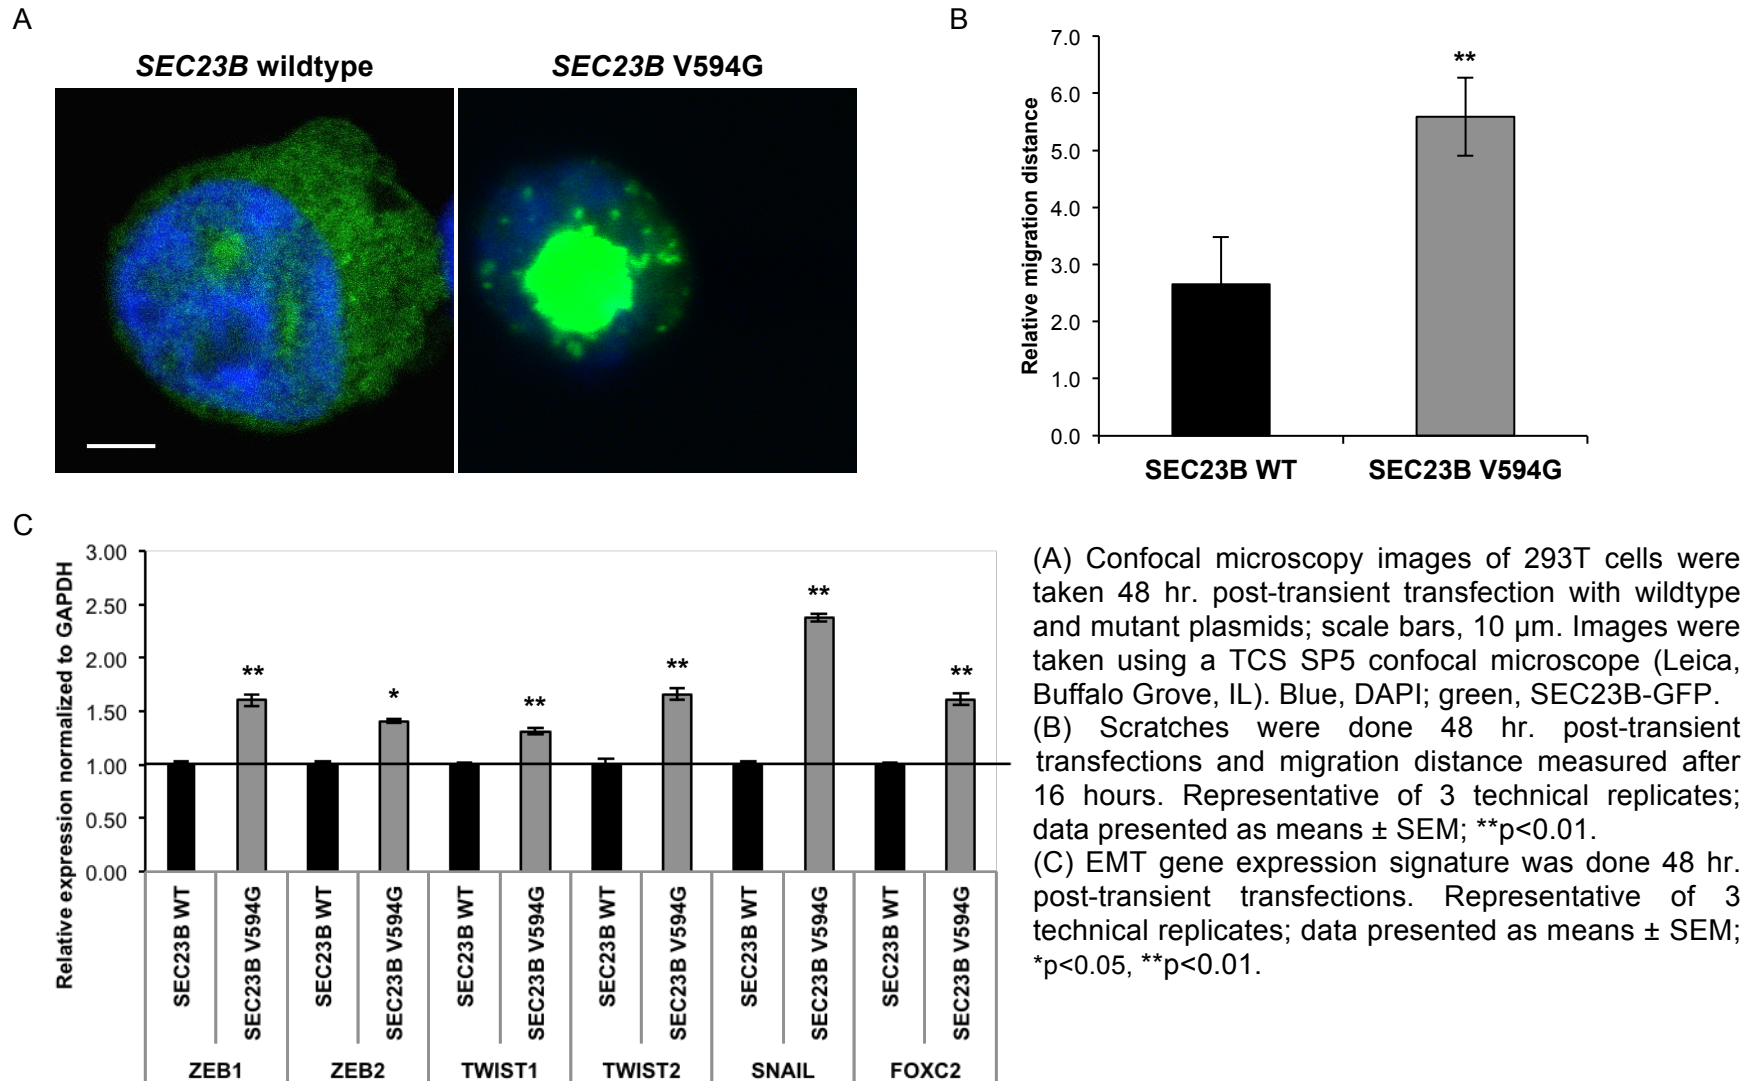

Figure S3: Immunoprecipitation of SEC23B and SAR1A in 293T-*SEC23B* WT and 293T-*SEC23B* V594G cells

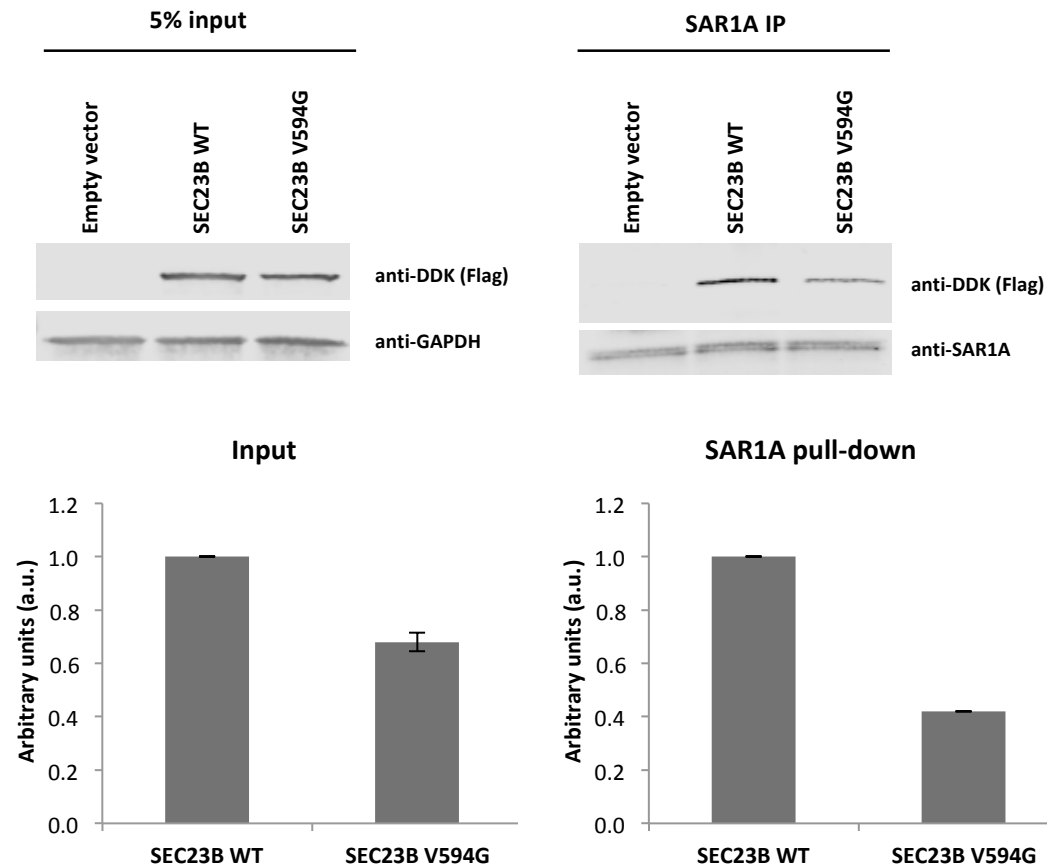

Immunoprecipitation of SEC23B and SAR1A in transiently transfected 293T cells shows decreased interaction of SAR1A with the mutant SEC23B V594G protein. Bands were quantified using Image J software (NIH, Bethesda, MD; <http://imagej.nih.gov/ij/>) and normalized to GAPDH. Representative of n=2 biological replicates with data presented as means  $\pm$  SEM.

Figure S4. SEC23B-GFP Expression Pattern in Nthy-*SEC23B* WT, Nthy-*SEC23B* V594G, and Nthy-*SEC23B* E109K Stable Cell Lines

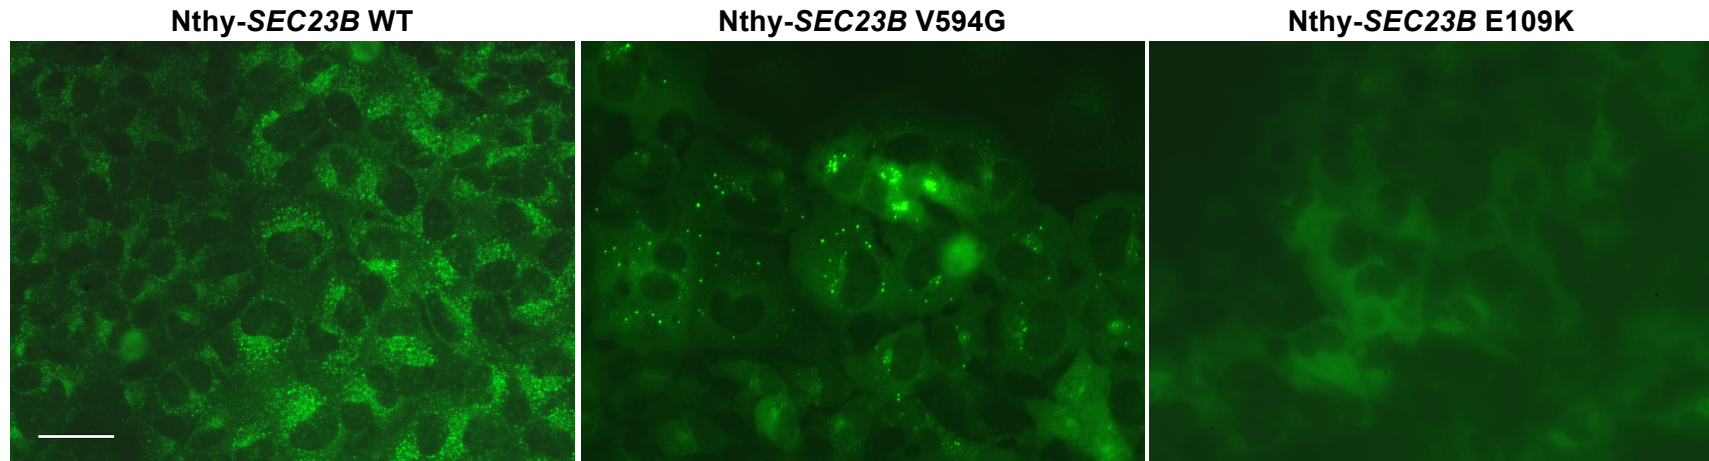

Nthy-*SEC23B* WT cells show an expression pattern typical of ER and Golgi resident proteins. Consistent with our findings in 293T transiently transfected cells, a population of Nthy-*SEC23B* V594G cells (representing the mutation existing in family 616) show aberrant accumulation of SEC23B protein. The Nthy-*SEC23B* E109K cells (representing a very common CDAll founder mutation) show faint cytoplasmic expression in the absence of the typical expression pattern, consistent with loss of SEC23B function. Scale bars, 50  $\mu$ m. Images were taken using a Leica DMI3000B manual inverted microscope (Leica, Buffalo Grove, IL).

Figure S5. Nthy-*SEC23B* WT and Nthy-*SEC23B* V594G Cells Show Similar Growth, Viability, And Migration

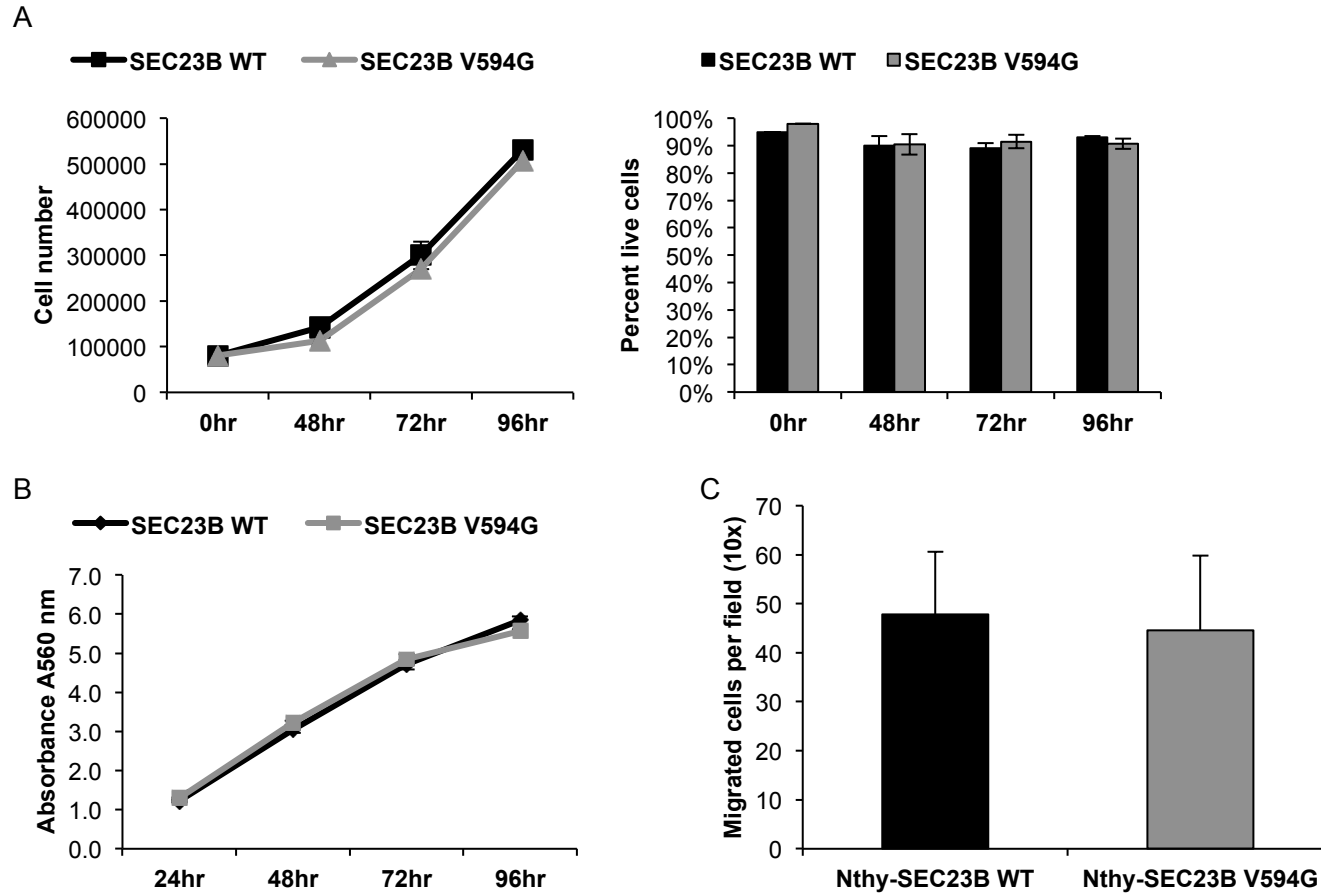

(A) Wildtype and mutant cells were counted for up to 96 hours post seeding. Trypan blue stain was used to count dead cells and assess viability. Data is representative of 3 technical replicates at each time point; data presented as means  $\pm$  SEM.

(B) MTT assay done in triplicates for each genotype; data presented as means  $\pm$  SEM.

(C) Transwell migration data is representative of n=2 biological replicates done in triplicates for each genotype; data presented as means  $\pm$  SEM.

Figure S6. Thapsigargin Induces an Epithelial-to-Mesenchymal Transition (EMT) Phenotype in Wildtype and Mutant Cell Lines

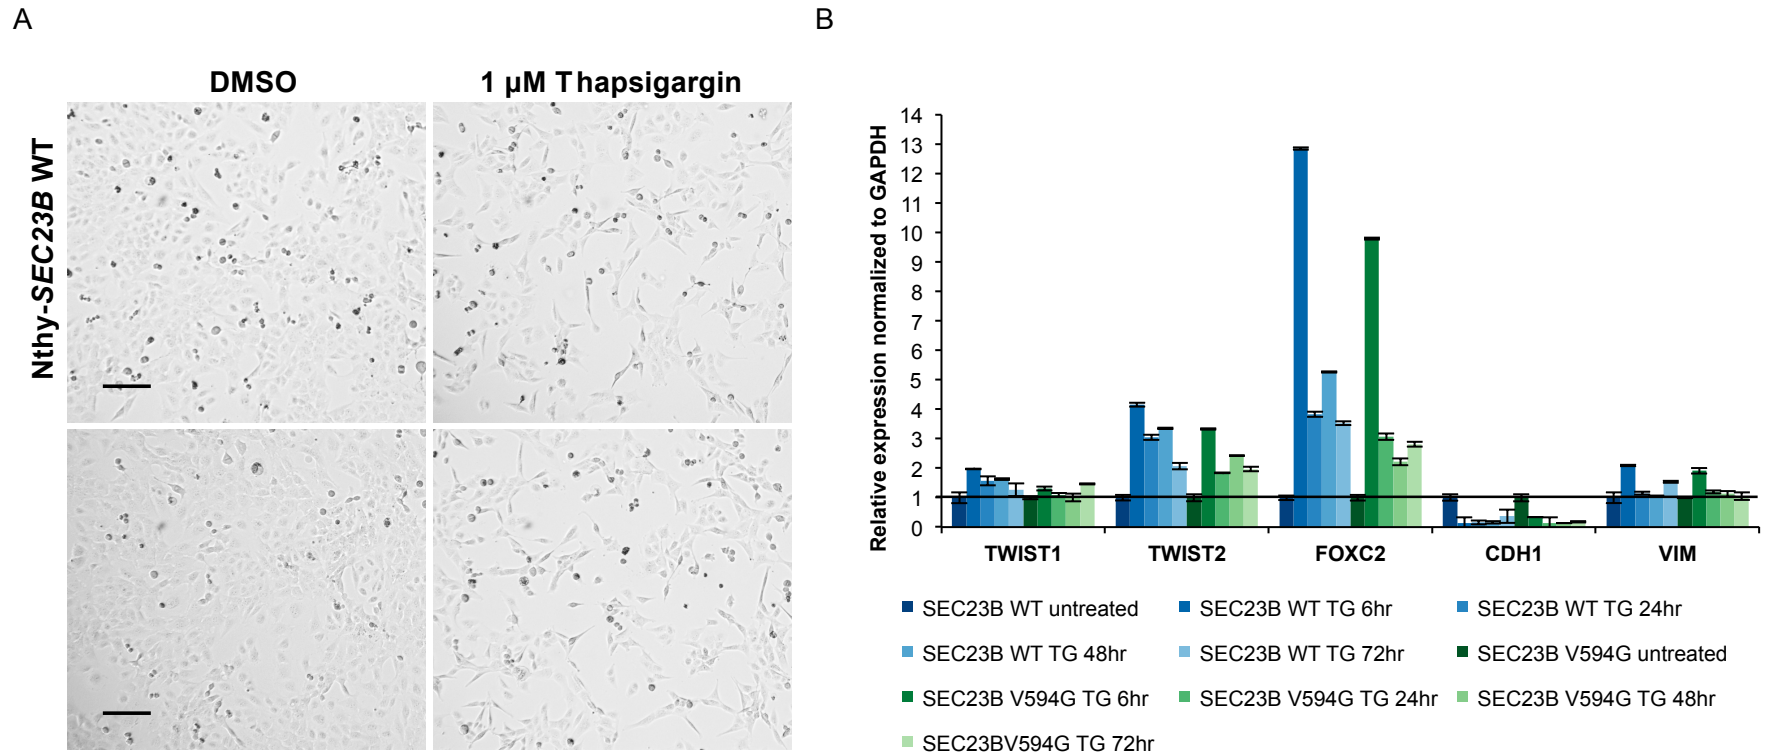

(A) Nthy-SEC23B WT and Nthy-SEC23B V594G cells were seeded at equal cell densities, grown overnight, and treated with 1  $\mu$ M Thapsigargin. A cell morphological change consistent with EMT (spindle-shaped mesenchymal appearance) is evident by 24 hr. post treatment. Scale bars, 200  $\mu$ m.

(B) EMT signature genes are upregulated at the transcriptional level as early as 6 hr. post treatment with 1  $\mu$ M Thapsigargin. TG, Thapsigargin. qPCR data representative of 3 technical replicates; data presented as means  $\pm$  SEM.

Figure S7. ER Stress-Activated Unfolded Protein Response (UPR) Pathway Gene Expression Remains Upregulated at 14 Days Post Thapsigargin Treatment and Nthy-SEC23B V594G Mutant Cell Colonies Survive Chronic ER Stress

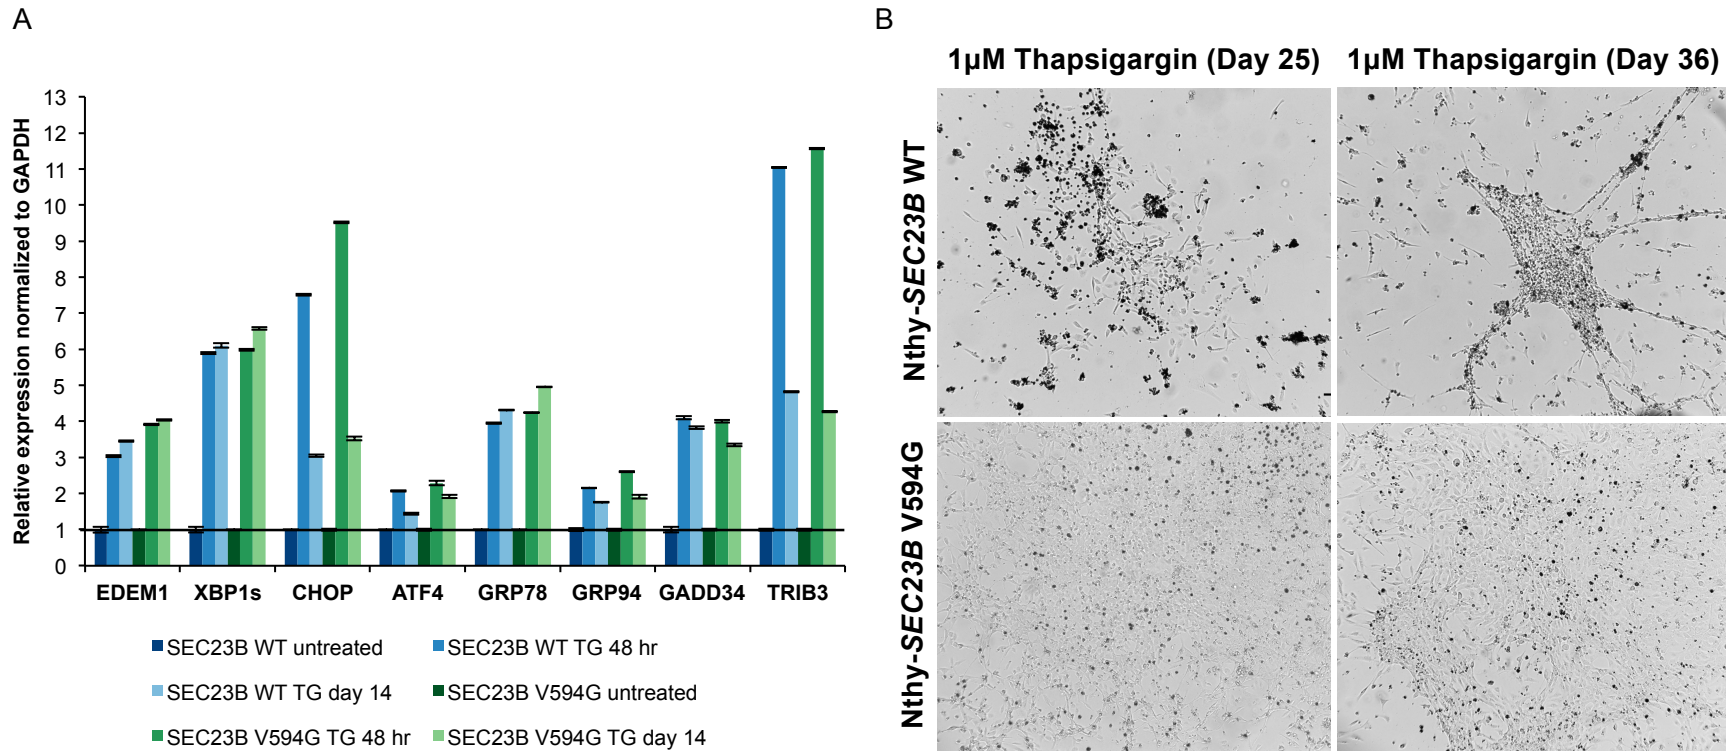

(A) UPR activity remains elevated after 14 days of Thapsigargin treatment, suggesting that chronic ER stress had been induced and still exists when we observe phenotype differences between the surviving fractions of wildtype and mutant cells. TG, Thapsigargin. Representative of 3 technical replicates; data presented as means  $\pm$  SEM.

(B) Nthy-SEC23B WT and Nthy-SEC23B V594G cells were seeded at equal cell densities, grown overnight, and then treated with 1 $\mu$ M Thapsigargin. Epithelial cell colonies sustained for up to 36 days post Thapsigargin treatment. Scale bars, 200  $\mu$ m. Representative of 3 biological replicates, with images shown originating from 2 independent experiments.

Table S1. International Cowden Syndrome Consortium Operational Criteria for the Diagnosis of Cowden Syndrome (Ver. 2006)

| <u>Pathognomonic</u>                                                                                                                                                                                                                                                                                                                                                                                                                                                           | <u>Major</u>                                                                                                        | <u>Minor</u>                                                                                                                                                                                                                                                                                   |
|--------------------------------------------------------------------------------------------------------------------------------------------------------------------------------------------------------------------------------------------------------------------------------------------------------------------------------------------------------------------------------------------------------------------------------------------------------------------------------|---------------------------------------------------------------------------------------------------------------------|------------------------------------------------------------------------------------------------------------------------------------------------------------------------------------------------------------------------------------------------------------------------------------------------|
| Adult Lhermitte-Duclos disease<br>Mucocutaneous lesions<br>Trichilemmomas, facial<br>Acral keratoses<br>Papillomatous papules<br>Mucosal lesions                                                                                                                                                                                                                                                                                                                               | Breast cancer<br>Thyroid cancer (nonmedullary)<br>Macrocephaly (i.e., $\geq$ 97th percentile)<br>Endometrial cancer | Other thyroid lesions (eg, adenoma, multinodular goiter)<br>Mental retardation (i.e., $\text{IQ} \leq 75$ )<br>GI hamartomas<br>Fibrocystic breast disease<br>Lipomas<br>Fibromas<br>Genitourinary tumors (especially renal cell carcinoma)<br>Genitourinary malformations<br>Uterine fibroids |
| <u>Operational diagnosis in an individual</u><br>Any of following:<br>Mucocutaneous lesions alone, if $\geq$ six facial papules (three of which must be trichilemmomas)<br>Cutaneous facial papules and oral mucosal papillomatosis<br>Oral mucosal papillomatosis and acral keratoses<br>$\geq$ Six palmoplantar keratoses<br>$\geq$ Two major criteria (one of which must be macrocephaly or LDD)<br>One major and $\geq$ three minor criteria<br>$\geq$ Four minor criteria |                                                                                                                     |                                                                                                                                                                                                                                                                                                |
| <u>Operational diagnosis in a family where one individual is diagnostic for CS</u><br>Any one pathognomonic criterion<br>Any one major criteria $\pm$ minor criteria<br>Two minor criteria<br>History of Bannayan-Riley-Ruvalcaba syndrome                                                                                                                                                                                                                                     |                                                                                                                     |                                                                                                                                                                                                                                                                                                |

Table S2. Validation of Prioritised Variants through Sanger Sequencing in the Proband and Members of Pedigree 616

| Genes           | Gene variants                                                                                                                                                         | Proband | Affected | Affected | Affected | Affected | Unaffected | Unaffected | Unaffected |
|-----------------|-----------------------------------------------------------------------------------------------------------------------------------------------------------------------|---------|----------|----------|----------|----------|------------|------------|------------|
|                 |                                                                                                                                                                       | III-2   | III-4    | IV-4     | IV-1     | II-3     | IV-5       | IV-3       | III-3      |
| <i>ANK2</i>     | NM_001148: c.9859A>T, p.Ile3287Phe                                                                                                                                    | +       | +        |          | +        | +        | +          | +          |            |
| <i>ARHGAP40</i> | NM_001164431: c.872T>C, p.Ile291Thr                                                                                                                                   | +       |          |          | +        | +        |            |            |            |
| <i>BTBD7</i>    | NM_001002860: c.2291C>T, p.Pro764Leu;<br>c.2272_2273insGGAGTTTGAGACCAGAT<br>TGGGCAACATAGGGAAATCC,<br>p.Leu758_Pro759delinsWSLRPDWAT*;<br>c.2275_2288del, p.759_763del | -       | NS       | NS       | NS       | NS       | NS         | NS         | NS         |
| <i>C16orf72</i> | NM_014117: c.253T>C, p.Ser85Pro                                                                                                                                       | +       | +        | +        | +        | +        |            |            |            |
| <i>C4orf29</i>  | NM_001039717: c.1199G>A, p.Gly400Glu                                                                                                                                  | +       | +        | +        |          |          | +          |            |            |
| <i>CBS</i>      | NM_001178009:<br>c.832_833insCTGGGGTGGATCATCCAG<br>GTGGGGCTTTTGCTGGGCTTGAGCCCT<br>GAAGCCGCGCCCTCTGCAGATCA,<br>p.Ile278_Gly279delinsTGVDHPGGAF                         | -       | NS       | NS       | NS       | NS       | NS         | NS         | NS         |
| <i>DCTN1</i>    | NM_001190836: c.1379G>A, p.Arg460His                                                                                                                                  | +       | +        |          | +        |          | +          | +          |            |
| <i>DNAH14</i>   | NM_001373: c.5509G>A, p.Gly1837Arg                                                                                                                                    | +       |          |          |          |          |            |            |            |
| <i>ENPP4</i>    | NM_014936: c.643G>A, p.Gly215Ser                                                                                                                                      | +       |          |          |          |          |            |            |            |
| <i>ERMP1</i>    | NM_024896: c.2584G>A, p.Val862Met                                                                                                                                     | +       | +        |          | +        |          | +          | +          |            |
| <i>FAM161A</i>  | NM_001201543: c.336delA,<br>p.Lys112Asnfs*2                                                                                                                           | +       | +        |          | +        |          | +          | +          |            |
| <i>FRMD4A</i>   | NM_018027: c.2039G>A, p.Arg680Gln                                                                                                                                     | +       |          |          |          |          |            |            |            |
| <i>GBF1</i>     | NM_001199378: c.2050delT, p.Phe684fs                                                                                                                                  | -       | NS       | NS       | NS       | NS       | NS         | NS         | NS         |
| <i>GCNT1</i>    | NM_001097634: c.215_216insG, p.<br>Val73Glyfs*4                                                                                                                       | +       | +        | +        |          |          |            |            |            |
| <i>GLI2</i>     | NM_005270: c.4729G>A, p.Glu1577Lys                                                                                                                                    | +       |          |          |          |          |            |            |            |
| <i>GLI3</i>     | NM_000168: c.563C>A, p.Ser188Tyr                                                                                                                                      | +       | +        | +        | +        |          |            | +          |            |
| <i>LONRF3</i>   | NM_001031855: c.662C>A, p.Pro221Gln                                                                                                                                   | +       |          |          |          |          |            |            |            |
| <i>MIB1</i>     | NM_020774: c.769G>C, p.Asp257His                                                                                                                                      | +       | +        | +        | +        | +        |            | +          |            |
| <i>MYO7A</i>    | NM_000260: c.3659C>T, p.Pro1220Leu                                                                                                                                    | +       |          |          | +        |          |            |            |            |
| <i>NHSL1</i>    | NM_001144060: c.2209C>T, p.Arg737Trp                                                                                                                                  | +       |          |          | +        |          |            |            |            |
| <i>NOX5</i>     | NM_001184780: c.1621C>T, p.Arg541Cys                                                                                                                                  | +       |          |          |          |          |            |            |            |

|                      |                                                     |   |    |    |    |    |    |    |    |
|----------------------|-----------------------------------------------------|---|----|----|----|----|----|----|----|
| <i>PACRGL</i>        | NM_145048: c.338T>G, p.Phe113Cys                    | + |    |    | +  |    |    |    |    |
| <i>PARD6B</i>        | NM_032521: c.503C>A, p.Pro168His                    | + | +  |    | +  | +  | +  | +  |    |
| <i>PATL1</i>         | NM_152716: c.1085G>A, p.Arg362His                   | + |    |    |    |    |    |    |    |
| <i>PLA2G4E</i>       | NM_001206670: c.1499G>A, p.Arg500His                | + | +  | +  |    |    |    | +  |    |
| <i>POLE</i>          | NM_006231: c.5071C>T, p.Arg1691Cys                  | + | +  |    | +  |    | +  | +  |    |
| <i>PRTFDC1</i>       | NM_020200: c.612_613insAGTCACCA, p.Tyr205fs         | - | NS |
| <i>PSKH2</i>         | NM_033126: c.572A>G, p.Tyr191Cys                    | + |    |    | +  | +  |    |    |    |
| <i>PTPN2</i>         | NM_002828: c.1204G>A, p.Ala402Thr                   | + | +  | +  | +  | +  |    |    |    |
| <i>RBM20</i>         | NM_001134363: c.3015T>G, p.Asp1005Glu               | + |    |    |    |    |    |    |    |
| <i>RDH5</i>          | NM_002905: c.524A>T, p.Tyr175Phe                    | + |    |    | +  |    |    |    |    |
| <i>RNF215</i>        | NM_001017981: c.884G>A, p.Arg295His                 | + | +  | +  |    | +  | +  |    |    |
| <i>ROBO2</i>         | NM_002942: c.3233C>A, p.Pro1078Gln                  | + | +  |    |    |    | +  |    |    |
| <i>RPS6KB2</i>       | NM_003952: c.941G>A, p.Gly314Asp                    | + |    |    | +  |    |    |    |    |
| <i>SCN10A</i>        | NM_006514: c.4086G>C, p.Gln1362His                  | + | +  |    |    | +  |    |    |    |
| <u><i>SEC23B</i></u> | NM_001172745: c.1781T>G, p.Val594Gly                | + | +  | +  | +  | +  |    |    |    |
| <i>SLC18A1</i>       | NM_003053: c.1375T>C, p.Trp459Arg                   | + |    |    | +  | +  |    |    |    |
| <i>SPTBN1</i>        | NM_003128: c.3564+1G>T                              | - | NS |
| <i>TIE1</i>          | NM_005424: c.710G>A, p.Cys237Tyr                    | + |    |    | +  |    |    |    |    |
| <i>TUBB1</i>         | NM_030773: c.763G>A, p.Val255Met                    | + |    |    | +  |    |    |    |    |
| <i>UTF1</i>          | NM_003577: c.962C>T, p.Ala321Val                    | + |    |    |    |    |    |    |    |
| <i>VPS13C</i>        | NM_001018088: c.8972_8975delTGTT, p.Lys2991Argfs*43 | + | +  |    |    |    |    |    |    |
| <i>WDR24</i>         | NM_032259: c.2363A>T, p.Glu788Val                   | + |    |    |    |    |    |    |    |
| <i>ZNF74</i>         | NM_001256525: c.632G>T, p.Gly211Val                 | + | +  |    |    | +  | +  |    |    |

NS = not sequenced since these variants were false positive upon Sanger sequencing in the proband (III-2)  
Underlined genes are with variants occurring in all affected members of Family 616

Table S3. Demographic and Clinical Characteristics of CS/CSL Patients (n=96) Selected for *C16orf72*, *PTPN2*, and *SEC23B* Germline Mutation Screening

| Demographic and clinical characteristics | Mean or number [range] |
|------------------------------------------|------------------------|
| <i>Age</i>                               | 55 [18-80]             |
| <i>Sex</i>                               |                        |
| Female                                   | 78                     |
| Male                                     | 18                     |
| <i>CC score</i>                          | 12 [1-26]              |
| <i>Thyroid cancer</i>                    | 89                     |
| Follicular                               | 25                     |
| Papillary                                | 26                     |
| Follicular variant papillary             | 31                     |
| Hurthle Cell                             | 3                      |
| Not otherwise specified (NOS)            | 2                      |
| Poorly differentiated                    | 1                      |
| Anaplastic                               | 1                      |
| <i>Benign thyroid</i>                    |                        |
| Goiter                                   | 52                     |
| Hashimoto's thyroiditis                  | 21                     |
| <i>Breast cancer</i>                     |                        |
| Primary invasive                         | 27                     |
| Ductal                                   | 18                     |
| Lobular                                  | 3                      |
| Mixed                                    | 2                      |
| NOS                                      | 4                      |
| Carcinoma <i>in situ</i>                 | 25                     |
| <i>Benign breast</i>                     | 43                     |
| Atypical ductal hyperplasia              | 4                      |
| Atypical lobular hyperplasia             | 1                      |
| Fibrocystic breast disease               | 36                     |
| Breast papilloma                         | 4                      |
| Breast fibroadenoma                      | 5                      |
| <i>Female genitourinary cancer</i>       |                        |
| Uterine cancer                           | 9                      |
| Endometrioid                             | 4                      |
| NOS                                      | 5                      |
| <i>Other CS/CSL features</i>             |                        |
| Macrocephaly                             | 40                     |
| Trichilemmoma                            | 11                     |
| Acral keratosis                          | 8                      |
| Papillomatous papules                    | 17                     |
| Lipoma                                   | 27                     |
| Fibroma                                  | 5                      |
| Hemangioma                               | 14                     |
| Melanoma                                 | 3                      |
| GI polyps                                | 27                     |
| GI cancer                                | 2                      |
| Uterine fibroids                         | 30                     |
| Renal cell carcinoma                     | 9                      |

Table S4. Structural Effects of Missense *SEC23B* Variants Observed in CS and Apparently Sporadic Thyroid, Breast, and Endometrial Cancers

| Missense variants     | Structural change                                                                   | Protein domain and predicted impact on protein structure                                                                                                                 |
|-----------------------|-------------------------------------------------------------------------------------|--------------------------------------------------------------------------------------------------------------------------------------------------------------------------|
| c.40C>T, p.Arg14Trp   | 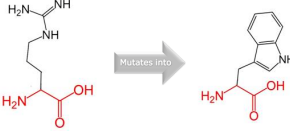   | Residue at the surface of a domain of unknown function<br>Disturbed ionic interaction with glutamic acid at position 13, aspartic acid at position 15                    |
| c.74C>A, p.Pro25His   | 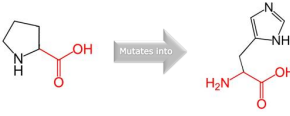   | Residue buried in the core of a domain<br>Disturbed core structure of the domain and loss of hydrophobic interactions in the protein core                                |
| c.167A>G, p.Tyr56Cys  | 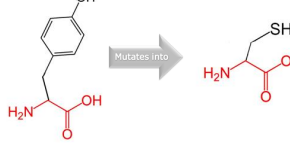   | Residue part of Zinc Finger, Sec23/sec24-Type domain<br>Disturbed interaction with residues in other domains and suspected impact on protein function                    |
| c.301A>G, p.Ile101Val | 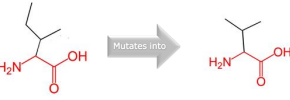   | Residue part of Zinc Finger, Sec23/sec24-Type domain<br>Disturbed interaction with residues in other domains and empty space in the protein core due to size differences |
| c.389T>C, p.Ile130Thr | 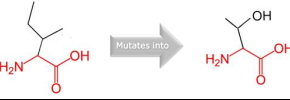  | Residue part of Sec23/sec24, Trunk Domain<br>Empty space in the protein core due to size differences and loss of hydrophobic interactions in the protein core            |
| c.490G>T, p.Val164Leu | 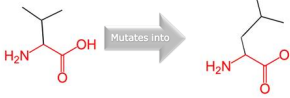 | Residue part of Sec23/sec24, Trunk Domain<br>Disturbed core structure of the domain and slight destabilization of local secondary structural conformation                |
| c.884C>A, p.Pro295His | 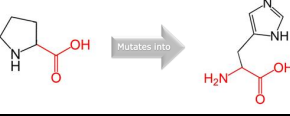 | Residue part of Sec23/sec24, Trunk Domain<br>Disturbed core structure of the domain and loss of hydrophobic interactions in the protein core                             |
| c.985G>T, p.Ala329Ser | 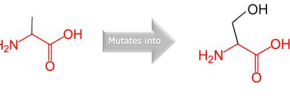 | Residue part of Sec23/sec24, Trunk Domain<br>Disturbed core structure of the domain and loss of hydrophobic interactions in the protein core                             |

|                        |                                                                                    |                                                                                                                                                                                                                                             |
|------------------------|------------------------------------------------------------------------------------|---------------------------------------------------------------------------------------------------------------------------------------------------------------------------------------------------------------------------------------------|
| c.1484G>A, p.Arg495His | 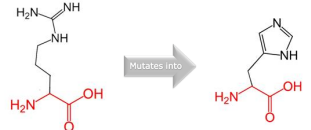  | Residue part of Sec23/sec24 Beta-Sandwich<br>Wildtype residue forms a salt bridge with glutamic acid at position 118, aspartic acid at position 395, aspartic acid at position 399; difference in charge will disturb the ionic interaction |
| c.1598T>G, p.Val533Gly | 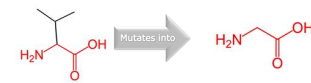  | Residue part of Sec23/sec24, Helical Domain<br>Disturbed core structure of the domain and loss of hydrophobic interactions in the protein core                                                                                              |
| c.1636C>T, p.Arg546Trp | 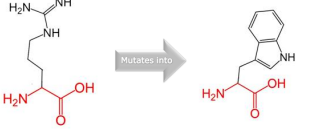  | Residue part of Sec23/sec24, Helical Domain<br>Wildtype residue forms a salt bridge with aspartic acid at position 543; difference in charge will disturb the ionic interaction                                                             |
| c.1661G>A, p.Arg554Gln | 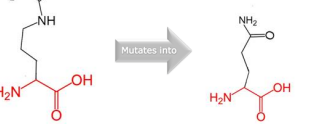  | Residue part of Sec23/sec24, Helical Domain<br>Wildtype residue forms a salt bridge with cysteine at position 767; difference in charge will disturb the ionic interaction                                                                  |
| c.1781T>G, p.Val594Gly | 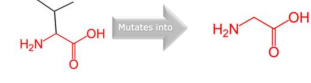  | Residue part of Sec23/sec24, Helical Domain<br>Disturbed core structure of the domain and loss of hydrophobic interactions in the protein core                                                                                              |
| c.2031G>A, p.Met677Ile | 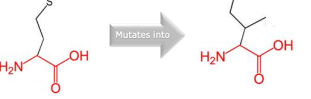  | Residue part of Gelsolin-Like Domain<br>Possible loss of external interactions due to size differences                                                                                                                                      |
| c.2101C>T, p.Arg701Cys | 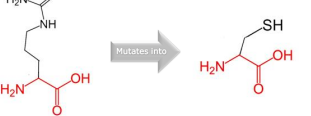 | Residue part of Gelsolin-Like Domain<br>Wildtype residue forms a hydrogen bond and salt bridge with aspartic acid at position 653; size and charge differences disrupt these interactions resulting in aberrant protein folding             |

Data extracted from the HOPE server (<http://www.cmbi.ru.nl/hope/>)

Protein Data Bank (PDB) input accession code: Protein transport protein Sec23B - Q15437 (SC23B\_HUMAN).

Table S5. Germline *SEC23B*, *C16orf72* and *PTPN2* in TCGA Thyroid, Breast, and Endometrial Cancer Datasets

| Cancer datasets | Gene            | Variants                            | Allele frequency <sup>a</sup> | Number of cases | Frequency |
|-----------------|-----------------|-------------------------------------|-------------------------------|-----------------|-----------|
| THCA<br>(n=494) | <i>C16orf72</i> | c.416G>A, p.Arg139His               | A=9/G=12985                   | 1               | 0.6%      |
|                 |                 | c.365G>A, p.Arg122Gln               | A=20/G=12974                  | 2               |           |
|                 | <i>PTPN2</i>    | c.31G>C, p.Glu11Gln                 | 0                             | 1               | 0.2%      |
|                 | <i>SEC23B</i>   | c.1661G>A, p.Arg554Gln <sup>b</sup> | 0                             | 1               | 4.0%      |
|                 |                 | c.1598T>G, p.Val533Gly <sup>b</sup> | 0                             | 3               |           |
|                 |                 | c.167A>G, p.Tyr56Cys                | 0                             | 1               |           |
|                 |                 | c.301A>G, p.Ile101Val               | 0                             | 1               |           |
|                 |                 | c.689+1G>C                          | 0                             | 1               |           |
|                 |                 | c.2101C>T, p.Arg701Cys              | 0                             | 1               |           |
|                 |                 | c.1636C>T, p.Arg546Trp              | T=1/C=13005                   | 1               |           |
|                 |                 | c.2031G>A, p.Met677Ile              | A=2/G=13004                   | 1               |           |
|                 |                 | c.40C>T, p.Arg14Trp                 | T=3/C=13003                   | 1               |           |
|                 |                 | c.1484G>A, p.Arg495His              | A=95/G=12911                  | 1               |           |
|                 |                 | c.490G>T, p.Val164Leu               | T=97/G=12909                  | 8               |           |
| BRCA<br>(n=222) | <i>C16orf72</i> | c.365G>A, p.Arg122Gln               | A=20/G=12974                  | 3               | 1.4%      |
|                 | <i>PTPN2</i>    | c.1159A>G, p.Thr387Ala              | 0                             | 1               | 0.5%      |
|                 | <i>SEC23B</i>   | c.884C>A, p.Pro295His               | 0                             | 1               | 2.3%      |
|                 |                 | c.985G>T, p.Ala329Ser               | T=4/G=13002                   | 1               |           |
| UCEC<br>(n=156) | <i>C16orf72</i> | -                                   | -                             | 0               | 0.0%      |
|                 |                 | c.739G>A, p.Val247Met               | T=43/C=12959                  | 1               | 0.7%      |
|                 | <i>SEC23B</i>   | c.389T>C, p.Ile130Thr               | 0                             | 1               | 2.6%      |
|                 |                 | c.649C>T, p.Arg217*                 | T=1/C=13005                   | 1               |           |
|                 |                 | c.490G>T, p.Val164Leu               | T=97/G=12909                  | 2               |           |

<sup>a</sup>Allele frequency data was extracted from the National Heart, Lung, and Blood Institute (NHLBI) Exome Sequencing Project (ESP) Exome Variant Server (<http://evs.gs.washington.edu/EVS/>) v.0.0.28 (accessed May 9, 2015).

<sup>b</sup>Both variants occur in the germline of the same thyroid cancer patient.

Abbreviations: THCA, thyroid cancer; BRCA, breast cancer; UCEC, uterine corpus endometrioid carcinoma.

Table S6. Germline *SEC23B* Variants Identified in the National Heart, Lung, and Blood Institute Exome Sequencing Project (NHLBI-ESP6500)

| Chr | Position | ID          | Variant type     | Variant          | Protein          | Allele count | MAF      | PolyPhen-2 (PP2)  | PP2 score |
|-----|----------|-------------|------------------|------------------|------------------|--------------|----------|-------------------|-----------|
| 20  | 18491496 | rs369908885 | Missense         | c.17A>T          | p.Glu6Val        | 2/13,004     | 0.000154 | probably-damaging | 0.975     |
| 20  | 18491519 | rs121918222 | Missense         | c.40C>T          | p.Arg14Trp       | 3/13,003     | 0.000231 | probably-damaging | 0.999     |
| 20  | 18491553 | rs6045440   | Missense         | c.74C>A          | p.Pro25His       | 5/13,001     | 0.000384 | probably-damaging | 1.000     |
| 20  | 18491560 | rs139419360 | Missense         | c.81C>A          | p.Ser27Arg       | 1/13,005     | 0.000077 | probably-damaging | 0.985     |
| 20  | 18491567 | rs145142114 | Missense         | c.88G>A          | p.Glu30Lys       | 1/13,005     | 0.000077 | probably-damaging | 0.997     |
| 20  | 18491582 | rs147576961 | Missense         | c.103G>A         | p.Val35Ile       | 1/13,005     | 0.000077 | possibly-damaging | 0.949     |
| 20  | 18491598 | rs376192392 | Missense         | c.119G>A         | p.Cys40Tyr       | 1/13,005     | 0.000077 | probably-damaging | 0.987     |
| 20  | 18491621 | rs142919912 | Missense         | c.142C>T         | p.Arg48Cys       | 2/13,004     | 0.000154 | probably-damaging | 0.998     |
| 20  | 18491697 | rs141084862 | Missense         | c.218T>G         | p.Leu73Arg       | 1/13,005     | 0.000077 | possibly-damaging | 0.953     |
| 20  | 18492882 | rs150263014 | Stop-gained      | c.235C>T         | p.Arg79*         | 1/12,973     | 0.000077 | -                 | -         |
| 20  | 18496339 | rs121918221 | Missense         | c.325G>A         | p.Glu109Lys      | 3/13,003     | 0.000231 | probably-damaging | 1.000     |
| 20  | 18496372 | rs372784283 | Missense         | c.358G>A         | p.Val120Met      | 1/13,005     | 0.000077 | possibly-damaging | 0.650     |
| 20  | 18505120 | rs145716758 | Missense         | c.410C>T         | p.Thr137Ile      | 2/13,004     | 0.000154 | possibly-damaging | 0.795     |
| 20  | 18505200 | rs36023150  | Missense         | c.490G>T         | p.Val164Leu      | 97/12,909    | 0.007458 | probably-damaging | 0.994     |
| 20  | 18505624 | rs121918226 | Stop-gained      | c.649C>T         | p.Arg217*        | 1/13,005     | 0.000077 | -                 | -         |
| 20  | 18506532 | rs121918224 | Stop-gained      | c.790C>T         | p.Arg264*        | 1/13,005     | 0.000077 | -                 | -         |
| 20  | 18506533 | rs148239360 | Missense         | c.791G>A         | p.Arg264Gln      | 1/13,005     | 0.000077 | probably-damaging | 1.000     |
| 20  | 18507015 | rs371646735 | Splice           | c.835-2A>G       | -                | 2/13,004     | 0.000154 | -                 | -         |
| 20  | 18507059 | rs375028100 | Missense         | c.877G>A         | p.Gly293Arg      | 1/13,005     | 0.000077 | probably-damaging | 0.994     |
| 20  | 18507167 | rs143417821 | Missense         | c.985G>T         | p.Ala329Ser      | 4/13,002     | 0.000308 | possibly-damaging | 0.878     |
| 20  | 18508181 | rs140387877 | Missense         | c.1035C>G        | p.His345Gln      | 1/13,005     | 0.000077 | probably-damaging | 0.975     |
| 20  | 18508197 | rs150042408 | Missense         | c.1051G>C        | p.Ala351Pro      | 1/13,005     | 0.000077 | probably-damaging | 0.994     |
| 20  | 18516354 | rs141002390 | Missense         | c.1372A>G        | p.Thr458Ala      | 2/13,004     | 0.000154 | possibly-damaging | 0.833     |
| 20  | 18516370 | -           | Frameshift indel | c.1389_1390delTG | p.Phe463Leufs*57 | 2/12,516     | 0.000160 | -                 | -         |
| 20  | 18516382 | rs150210442 | Missense         | c.1400A>G        | p.Asn467Ser      | 1/13,005     | 0.000077 | possibly-damaging | 0.740     |
| 20  | 18522989 | rs373944854 | Missense         | c.1454C>T        | p.Thr485Met      | 1/13,005     | 0.000077 | probably-damaging | 1.000     |

|    |          |             |                      |           |             |          |          |                   |       |
|----|----------|-------------|----------------------|-----------|-------------|----------|----------|-------------------|-------|
| 20 | 18523025 | rs368084647 | Missense             | c.1490G>A | p.Arg497His | 1/13,005 | 0.000077 | probably-damaging | 1.000 |
| 20 | 18523740 | rs368545054 | Missense             | c.1589G>A | p.Arg530Gln | 1/13,005 | 0.000077 | probably-damaging | 1.000 |
| 20 | 18523755 | rs377313915 | Missense             | c.1604G>T | p.Arg535Leu | 1/13,005 | 0.000077 | probably-damaging | 0.974 |
| 20 | 18523787 | rs147135162 | Missense             | c.1636C>T | p.Arg546Trp | 1/13,005 | 0.000077 | probably-damaging | 1.000 |
| 20 | 18523799 | rs199939108 | Stop-gained          | c.1648C>T | p.Arg550*   | 1/13,005 | 0.000077 | -                 | -     |
| 20 | 18529262 | rs150733820 | Missense             | c.1753C>T | p.His585Tyr | 5/13,001 | 0.000384 | possibly-damaging | 0.935 |
| 20 | 18529307 | rs373800759 | Missense             | c.1798G>A | p.Asp600Asn | 1/13,005 | 0.000077 | probably-damaging | 1.000 |
| 20 | 18529382 | rs368458175 | Missense             | c.1873C>A | p.Leu625Ile | 1/13,005 | 0.000077 | probably-damaging | 0.996 |
| 20 | 18529410 | rs372083109 | Missense             | c.1901C>T | p.Pro634Leu | 1/13,005 | 0.000077 | possibly-damaging | 0.929 |
| 20 | 18535752 | rs374644863 | Missense near-splice | c.2149G>T | p.Ala717Ser | 1/13,005 | 0.000077 | possibly-damaging | 0.859 |
| 20 | 18535813 | rs139750050 | Missense             | c.2210G>T | p.Gly737Val | 1/13,005 | 0.000077 | probably-damaging | 0.998 |
| 20 | 18541330 | rs368409065 | Missense             | c.2250C>G | p.Ser750Arg | 1/13,005 | 0.000077 | probably-damaging | 0.999 |

Data was extracted from the NHLBI-ESP Exome Variant Server (<http://evs.gs.washington.edu/EVS/>) v.0.0.30 (accessed May 30, 2015). We filtered variants to include those in coding regions of *SEC23B* and predicted to be damaging missense variants, splicing variants, and frameshift insertions and deletions, with a minor allele frequency (MAF) < 0.01 (1%) in both African-American and European-American populations. Gene transcripts used for variant calling: NM\_001172745 for all variants reported except for NM\_032986.3: c.1389\_1390delTG.

Abbreviations: Chr, chromosome; MAF, minor allele frequency.

Table S7. Odds Ratios for Presence of *SEC23B* Variants in Different Patient Populations

| MAF <sup>a</sup> | Category  | <i>SEC23B</i> variant |        | Frequency | OR     | 95% CI         | P-value |
|------------------|-----------|-----------------------|--------|-----------|--------|----------------|---------|
|                  |           | +                     | -      |           |        |                |         |
| ≤ 0.008          | NHLBI-ESP | 155                   | 12,851 | 0.0121    | 1.000  | 0.7990 - 1.252 | >0.9999 |
|                  | TCGA-THCA | 20                    | 986    | 0.0203    | 1.682  | 1.026 - 2.645  | 0.0401  |
|                  | TCGA-BRCA | 5                     | 439    | 0.0114    | 0.9443 | 0.3402 - 2.146 | 0.9533  |
|                  | TCGA-UCEC | 4                     | 308    | 0.0130    | 1.077  | 0.3364 - 2.665 | 0.8303  |
|                  | TCGA-all  | 29                    | 1,715  | 0.0170    | 1.402  | 0.9255 - 2.068 | 0.1068  |
| ≤ 0.0004         | NHLBI-ESP | 58                    | 12,948 | 0.0045    | 1.000  | 0.6931 - 1.443 | >0.9999 |
|                  | TCGA-THCA | 11                    | 977    | 0.0113    | 2.513  | 1.256 - 4.676  | 0.0116  |
|                  | TCGA-BRCA | 3                     | 441    | 0.0070    | 1.519  | 0.3752 - 4.333 | 0.4689  |
|                  | TCGA-UCEC | 2                     | 310    | 0.0065    | 1.440  | 0.2354 - 4.974 | 0.5778  |
|                  | TCGA-all  | 16                    | 1,728  | 0.0093    | 2.067  | 1.153 - 3.546  | 0.0166  |

<sup>a</sup>MAF cut-off derivation: we found both unique (absent in public databases) and previously reported *SEC23B* variants in our cancer patient populations (CS and TCGA). Previously reported variants had  $0.00008 \leq \text{MAF} \leq 0.008$ .  $\text{MAF} \leq 0.008$  was hence set as the upper limit to indicate all observed variants. The next most common variants had a MAF of 0.0004 (5/13,001), hence used as the upper cut-off threshold for more rare variants ( $0.00008 \leq \text{MAF} \leq 0.0004$ ).

Abbreviations: MAF, minor allele frequency; OR, odds ratio; 95% CI, 95% confidence interval; THCA, thyroid cancer; BRCA, breast cancer; UCEC, uterine corpus endometrioid carcinoma; all, THCA, BRCA, and UCEC.

Table S8. Hematologic Phenotypes of CS Cancer Patients with Identified Germline *SEC23B* Variants

| Patients                        | III-2                     | III-4                        | IV-1                      | IV-4                                                        | CCF05664                 | CCF04372            |
|---------------------------------|---------------------------|------------------------------|---------------------------|-------------------------------------------------------------|--------------------------|---------------------|
| <i>SEC23B</i> variant           | c.1781T>G,<br>p.Val594Gly | c.1781T>G,<br>p.Val594Gly    | c.1781T>G,<br>p.Val594Gly | c.1781T>G,<br>p.Val594Gly                                   | c.490G>T,<br>p.Val164Leu | c.1512T>C,<br>p.(=) |
| Cancer (age)                    | FvPTC (43)                | FvPTC (51)                   | PTC (21)                  | Endometrial ca. (35)                                        | PTC (45)                 | PTC (45)            |
| Age at CBC                      | 59                        | 63                           | 35                        | 35                                                          | 65                       | 45                  |
| RBC count (10 <sup>6</sup> /μL) | 4.09 (3.80-5.10)          | 3.41 (NA)                    | 4.72 (3.77-5.28)          | 3.05 (3.80-5.20)                                            | 4.51 (3.95-5.40)         | 4.60 (3.80-5.10)    |
| Hb (g/dL)                       | 13.0 (11.7-15.5)          | 11.9 (NA)                    | 14.4 (11.1-15.9)          | 8.6 (11.6-15.5)                                             | 14.6 (11.9-15.9)         | 13.7 (11.7-15.5)    |
| MCV (fL)                        | 94 (80-100)               | 101 (NA)                     | 90 (79-97)                | 87 (80-100)                                                 | 95 (78-95)               | 87.8 (81-100)       |
| Total bilirubin (mg/gL)         | -                         | -                            | 0.4 (0.0-1.2)             | -                                                           | 1.1 (0.2-1.3)            | -                   |
| Comments                        | Normal                    | Abnormal WBC<br>differential | Normal                    | Concurrent with<br>prolonged bleeding<br>(metromenorrhagia) | Normal                   | Normal              |

CDAll mean observed levels (n=patients)\*:

RBC (106/μl): 3.2 ± 0.1 (1.2-5.8; n=93)

Hb (g/dl): 9.6 ± 0.2 (3.6-16.4; n=161)

MCV (fL): 87.3 ± 1.0 (60.0-114.0; n=98)

Total bilirubin: 2.8 ± 0.2 (0.2-12.7; n=108)

\*Iolascon A. et al. American Journal of Hematology 89 (10): E169-E175 (2014)

Abbreviations: FvPTC, follicular variant PTC; PTC, papillary thyroid cancer; ca., carcinoma; CBC, complete blood count; Hb, hemoglobin; MCV, mean cell volume; NA, not available; WBC, white blood cell.
